# Supplementary material
Source: PubMed Central journal article supplement (PMC3416313)
Supplement: supp_86.13.7360_TableS1.pdf [file supp_86.13.7360_TableS1.pdf]

**Supplementary Table 1**

| <b>WNV Primer</b> | <b>Sequence (5' to 3')</b> | <b>Application</b> |
|-------------------|----------------------------|--------------------|
| 20F               | AGTAGTTCGCCTGTGTGAGC       | PCR/Seq            |
| 491R              | ATTTACCGTCATCATCACCT       | Seq                |
| 912R              | ACACTCCTTCCAAGAAGTCTC      | Seq                |
| 1493R             | TTCTCCAAGCTTTAGTGTGTA      | Seq                |
| 2492R             | CTCAGCTCTTGGCCGGCTGAT      | Seq                |
| 2993R             | GTCACATTCAGTTGTGTTGC       | Seq                |
| 3026F             | TGACTCGAAGATCATTGGAA       | PCR/ Seq           |
| 3497R             | TGTGACTGCACGAGGGTCTT       | PCR/ Seq           |
| 3998R             | GGTGTTAGCAGGGCTAGCGA       | Seq                |
| 4496R             | ATCCATATCTTCCAAGGTGC       | cDNA               |
| 4997R             | GATGTTCCAGTGGGGAAGT        | Seq                |
| 5501R             | GTGGAAATGTAACCTCTTGC       | Seq                |
| 5531F             | CATTTCCACAAAGGTCGAGC       | PCR/ Seq           |
| 6002R             | CCAACTTGCGACGGATTTCT       | PCR/ Seq           |
| 6503R             | CCCATGAAGTGCTCAGGCAT       | cDNA/Seq           |
| 7004R             | AAGTCCAAAAGAACTCTCC        | Seq                |
| 7505R             | GTGATCAA AATTCCGGCTTC      | Seq                |
| 7535F             | TTTGATCACGGCCGCAGCGG       | Seq                |
| 8006R             | AGTTGGGGCTCTTCATGTCC       | Seq                |
| 8036F             | GCCCCAACTAGTGCAAAGTT       | Seq                |
| 8537F             | CAAGAACAGGATTGAACGAC       | PCR/ Seq           |
| 9008R             | GACATTC CCCCCGCAGATGT      | PCR                |
| 9038F             | GGGGGGAATGTCACACTTGC       | Seq                |

|        |                       |          |
|--------|-----------------------|----------|
| 9509R  | TGAAAGTGTTTtagggCGTAG | Seq      |
| 9539F  | ACACTTTCACCAACCTGGCC  | Seq      |
| 10040F | TGGCCAACGCCATTTGCTCC  | Seq      |
| 10541F | TTCCCGCCACCGGAAGTTGA  | Seq      |
| 10511R | TGGCGGGAACTTCCCGGCCT  | cDNA     |
| 11012R | AGATCCTGTGTTCTCGCACC  | cDNA/PCR |

WNV RNA was harvested from viral supernatants and converted to four overlapping cDNA (~ 3 to 4 kb in size) by reverse transcription (Superscript III, Invitrogen) using the following primers: 11012R, 10511R, 6503R, and 4496R (marked cDNA). Subsequently, PCR was performed with overlapping paired primers (20F/3497R, 3026F/6002R, 5531F/9008R, and 8537F/11012R; marked PCR) using a Hi-Fidelity Taq Polymerase (Invitrogen). Products were sequenced bi-directionally with sequencing primers (marked Seq).
